# Supplementary material for: Transcriptional Dysregulation and Impaired Neuronal Activity in FMR1 Knock-Out and Fragile X Patients’ iPSC-Derived Models
Source: MDPI journal article supplement (doi:10.3390/ijms241914926), 2023-10-05
Supplement: s1 [file s1]

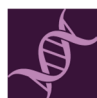

**Table S1.** Nucleotide sequences used for Crip editing, digital PCR, and Sanger sequencing.

|                                                 |                                                                                                                                                   |
|-------------------------------------------------|---------------------------------------------------------------------------------------------------------------------------------------------------|
| ssODN template containing the stop tag (in red) | TGCCACAAAAGATACTTTCCATAAGATCAAGCTGGATGTG <b>CGTAAC</b><br><b>TAGCTGA</b><br>AGTTGATACACAAGAAATGCTGAGAACTTGGAAGTGATAT                              |
| ddPCR primers                                   | FMR1taqF: GAACGTCTAAGATCTGTTAATCCCA<br>FMR1taqR2: CCATTTTGGCCAAAGTCCACCA                                                                          |
| LNA probes by IDT                               | FMR1wt-HEX: /5HEX/CCA +GAA +GA+C T+TA +CG/3IABkFQ<br>Stoptag-FAM: /56-FAM/CGTAA+C+TA+G+C+T+GA/3IABkFQ                                             |
| Primers for PCR/Sanger sequencing               | PCR<br>Forward: GAACGTCTAAGATCTGTTAATCCCA<br>Reverse: CCATTTTGGCCAAAGTCCACCA<br>Sequencing<br>GAACGTCTAAGATCTGTTAATCCCA<br>CCATTTTGGCCAAAGTCCACCA |

**Table S2.** List of antibodies.

| Cell type        | Antibody | Catalog                        | Dilution |
|------------------|----------|--------------------------------|----------|
| iPSC             | Nanog    | Abcam Ab21624                  | 1:200    |
|                  | TRA1-60  | Stem Cell Technologies #60064  | 1:200    |
|                  | OCT3/4   | Santa Cruz SC-8628             | 1:500    |
|                  | SSEA-4   | Santa Cruz SC-21704            | 1:500    |
| cNPC             | Nestin   | Abcam ab92391                  | 1:500    |
|                  | SOX1     | R&D AF3369                     | 1:100    |
|                  | Foxg1    | Abcam ab196868                 | 1:500    |
|                  | Ki67     | BD 556003                      | 1:200    |
| Astrocytes       | GFAP     | Millipore AB5804               | 1:250    |
| Cortical neurons | Tuj1     | Millipore MAB5564              | 1:200    |
|                  | Tuj1     | Covance                        | 1:1000   |
|                  | Map2     | Encor Biotechnology AB_2138173 | 1:1000   |
|                  | VGLUT1   | Synaptic System 135304         | 1:200    |
|                  | GABA     | Sigma a2052                    | 1:200    |

**Table S3.** List of TaqMan probes and primer sets (Applied Biosystems).

| Gene          | reference     |
|---------------|---------------|
| <i>OCT3/4</i> | Hs04260367_gH |
| <i>Nanog</i>  | Hs02387400_g1 |
| <i>FMR1</i>   | Hs00924547_m1 |
| <i>PAX6</i>   | Hs01088114_m1 |
| <i>SOX1</i>   | Hs01057642_s1 |
| <i>Nestin</i> | Hs04187831_g1 |
| <i>MAP2</i>   | Hs00258900_m1 |
| <i>S100B</i>  | Hs00902901_m1 |
| <i>FOXG1</i>  | Hs01850784_s1 |
| <i>SIX3</i>   | Hs00193667_m1 |
| <i>MAP1B</i>  | Hs01067016_m1 |
| <i>GRIA2</i>  | Hs00181331_m1 |
| <i>GABRA2</i> | Hs00168069_m1 |
| <i>SNAP25</i> | Hs00938957_m1 |
| <i>SYN1</i>   | Hs00199577_m1 |
| <i>PSD95</i>  | Hs01555373_m1 |
| <i>TUBB3</i>  | Hs00964962_g1 |
| <i>GFAP</i>   | Hs00909233_m1 |

|                |               |
|----------------|---------------|
| <i>VIM</i>     | Hs00958111_m1 |
| <i>SYP</i>     | Hs00300531_m1 |
| <i>SLC17A7</i> | Hs00220404_m1 |
| <i>NTRK2</i>   | Hs00178811_m1 |
| <i>GRIN2B</i>  | Hs01002012_m1 |
| <i>ACTB</i>    | Hs01060665_g1 |
| <i>GAPDH</i>   | Hs02786624_g1 |

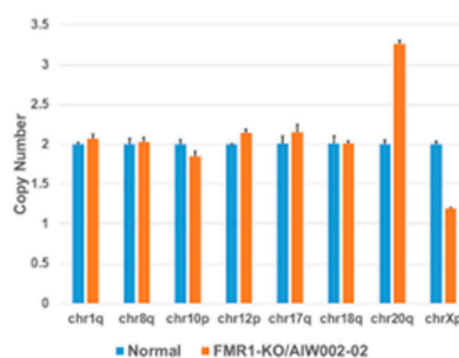

**Figure S1. Genomic stability testing of the *FMR1* KO iPSC line.** qPCR-based chromosomal abnormality analysis in the eight common critical areas within chr1q, chr8q, chr10p, chr12p, chr17q, chr18q, chr20q, and chrXp showed amplification in chr20q only.

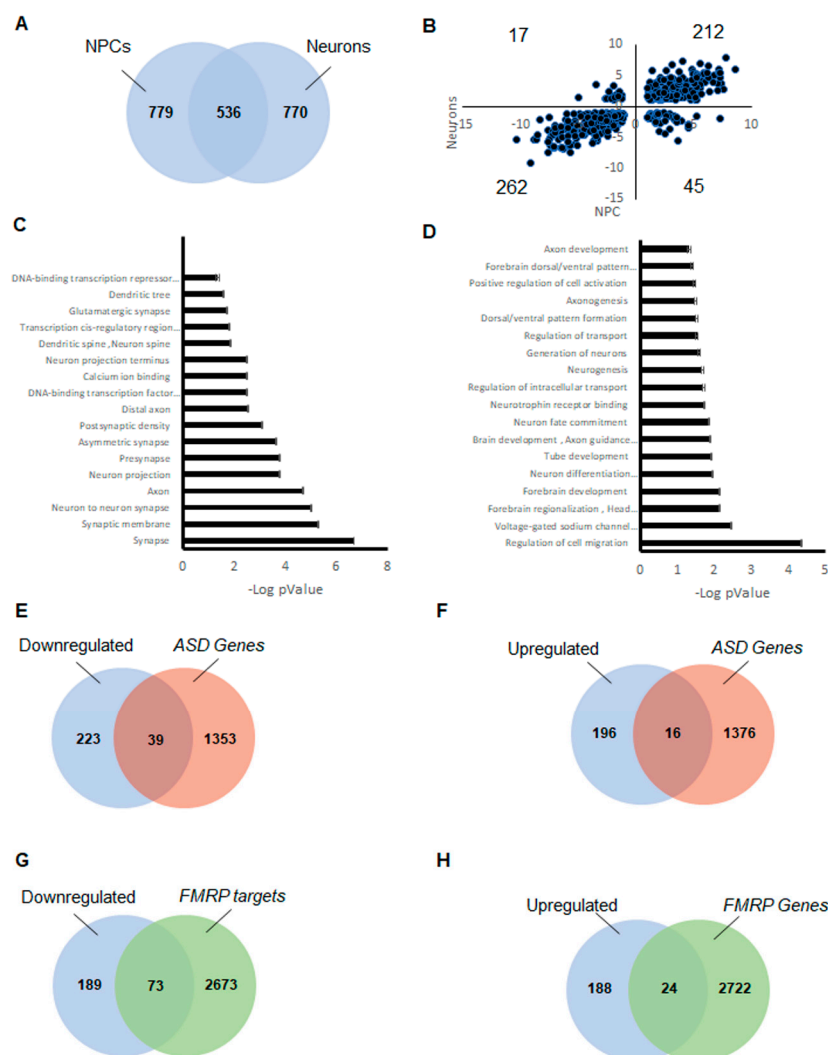

**Figure S2. Common transcriptional deregulations between *FMR1*-KO NPCs and Neurons.** A) Venn diagram of the differentially expressed genes in *FMR1* KO NPCs and *FMR1* KO neurons. B) Fold change distribution for the common set of genes differentially expressed in *FMR1* KO NPCs and Neurons. (C) GO terms defining the significant functional enrichment for the genes that are downregulated in *FMR1* KO NPCs and *FMR1* KO neurons. (D) GO terms defining the significant functional enrichment for the genes that are upregulated in *FMR1* KO NPCs and *FMR1* KO neurons. (E) Overlap between the genes significantly downregulated in *FMR1* KO NPCs and neurons, and the list of autism risk genes analyzed. (F) Overlap between the genes significantly upregulated in *FMR1* KO NPCs and neurons, and the list of autism risk genes. (G) Overlap between the genes significantly downregulated in *FMR1* KO NPCs and neurons, and the list of FMRP targets analyzed. (H) Overlap between the genes significantly upregulated in *FMR1* KO NPCs and neurons, and the list of FMRP targets analyzed.

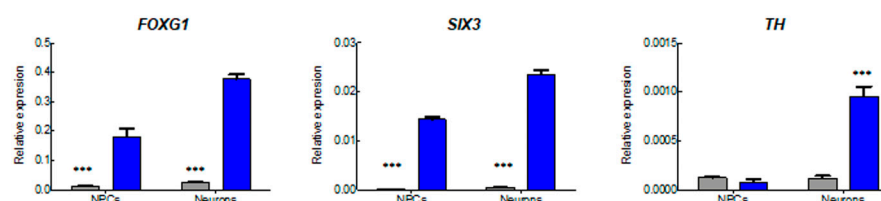

**Figure S3. Validation of differential gene expression by Real-Time PCR.** Normalized expression levels of *FOXG1*, *SIX3*, and *TH* mRNA in *FMR1* KO NPCs and neurons compared to control cells.

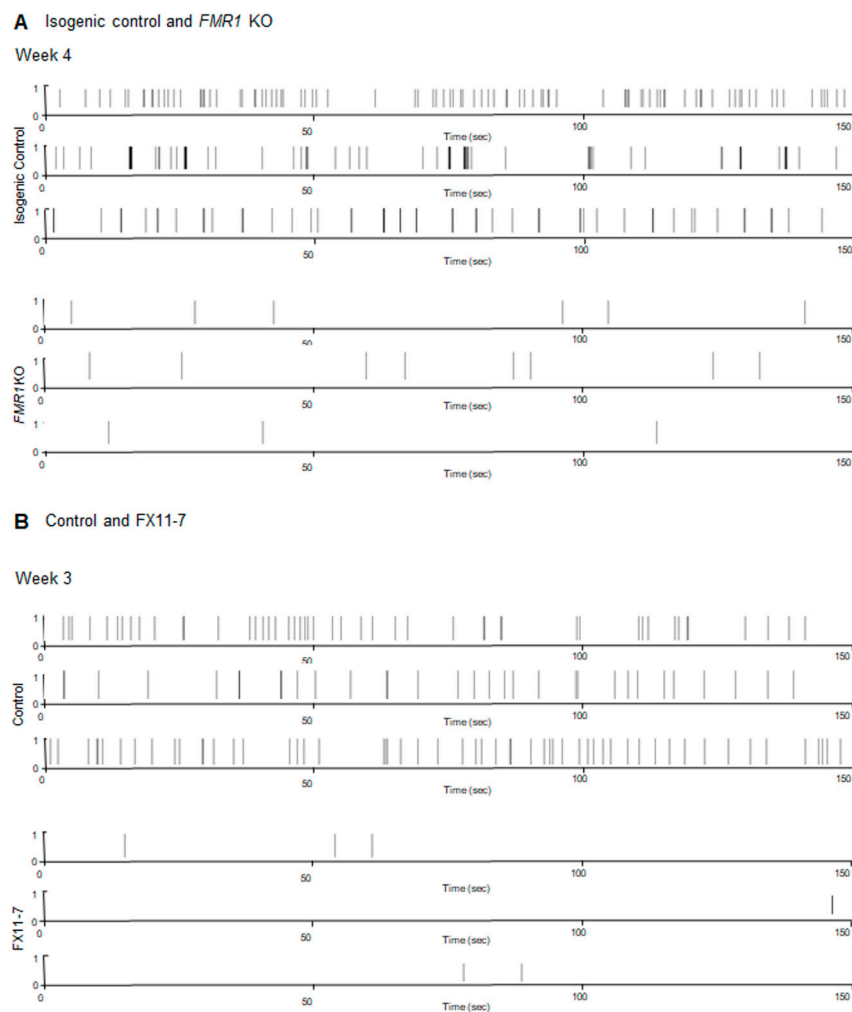

**Figure S4.** Validation of differential gene expression by Real-Time PCR. MEA raster plots from MEA recordings showing. Changes in electrical activity in week 3 to week 4 in cortical neurons from (A) Isogenic control and *FMR1* KO, and (B) Control and FX11-7.

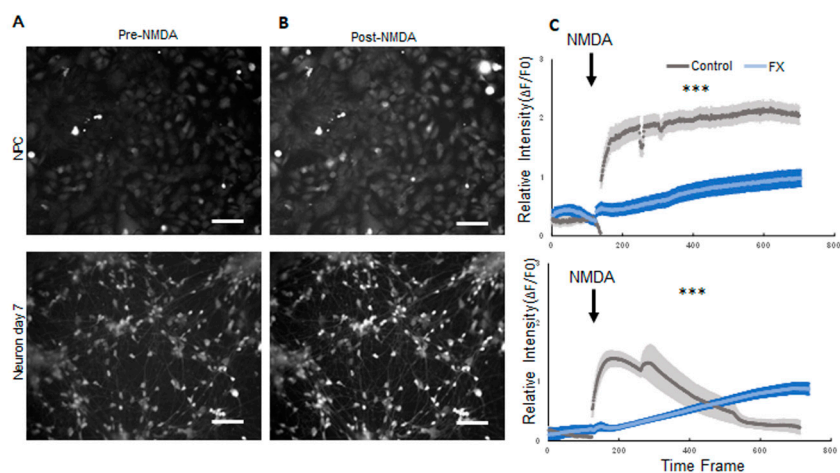

**Figure S5.** Differential NMDA response between control and FXS IPSC-derived NPCs and Neurons

## Supplementary results

### *Common deregulations between FMR1 KO NPCs and FMR1 KO neurons.*

The analysis of our RNA sequencing data shows that a similar number of genes were differentially expressed at the NPC and differentiating neuron stages (**Supplementary Figure 2**). Those genes include genes associated with synapse and neuronal formation, autism-associated genes, and FMRP targets. We then wondered how common the deregulated genes in *FMR1* KO cell lines at the NPC and neuronal stages are. Comparing the two gene lists (**Figure 6A** and **Figure 6B**), we found a set of 536 genes (40% of the DEGs) that were deregulated at both the NPC and neuronal stages (**Supplementary Figure 2**). We further examined the fold changes in the list of commonly deregulated genes. We found that 88% of them were either up or downregulated at both stages (**Supplementary Figure 2**). Genes that were found upregulated in *FMR1* KO NPCs and neurons are involved in brain development, neurogenesis, and forebrain specification (**Supplementary Figure 2**). These genes include *SIX3* and *FOXP1* which code for transcription factors whose mutations are respectively responsible for holoprosencephaly/schizencephaly [1], Rett-like, and *FOXP1* [2] syndromes. We have actually validated by Q-PCR the increased expression of *SIX3* and *FOXP1* in *FMR1* KO NPCs and Neurons ( $F_{SIX3} \text{ Genotype}=1145$ ;  $df=1$ ;  $p<0.0001$ ;  $t_{NPCs}=18.27$ ;  $p<0.001$ ;  $t_{Neurons}=29.60$ ;  $p<0.001$ ;  $F_{FOXP1} \text{ Genotype}=264.4$ ;  $df=1$ ;  $p<0.0001$ ;  $t_{NPCs}=7.491$ ;  $p<0.001$ ;  $t_{Neurons}=15.50$ ;  $p<0.001$ ). Genes downregulated in the *FMR1* KO NPCs and neurons were significantly enriched in synaptic function, axon, neuronal projections, and DNA binding transcription factor (**Supplementary Figure 2**). These functional enrichments observed from common deregulations in *FMR1* KO NPCs and neurons suggest that the regional specification of *FMR1* KO cells and their neuronal differentiation are impaired, leaving the cells in a progenitor-like state. We have also assessed these gene lists for enrichment in ASD-related genes and FMRP targets. Similarly, to what was observed in **Figure 6**, we found significant enrichment in ASD-related genes (39/262;  $p < 9.309e-05$ ) (**Supplementary Figure 2E**) and in FMRP targets (73/262;  $p < 2.526e-07$ ) (**Supplementary Figure 2G**) among the list of genes that are commonly downregulated in *FMR1* KO NPCs and neurons.

## References

1. Hehr, U.; Pineda-Alvarez, D. E.; Uyanik, G.; Hu, P.; Zhou, N.; Hehr, A.; Schell-Apacik, C.; Altus, C.; Daumer-Haas, C.; Meiner, A.; Steuernagel, P.; Roessler, E.; Winkler, J.; Muenke, M., Heterozygous mutations in *SIX3* and *SHH* are associated with schizencephaly and further expand the clinical spectrum of holoprosencephaly. *Hum Genet* **2010**, *127*, (5), 555–61.
2. Jacob, F. D.; Ramaswamy, V.; Andersen, J.; Bolduc, F. V., Atypical Rett syndrome with selective *FOXP1* deletion detected by comparative genomic hybridization: case report and review of literature. *Eur J Hum Genet* **2009**, *17*, (12), 1577–81.
